# Supplementary material for: Potent and Selective Benzothiazole-Based Antimitotics with Improved Water Solubility: Design, Synthesis, and Evaluation as Novel Anticancer Agents
Source: MDPI journal article supplement (doi:10.3390/pharmaceutics15061698), 2023-06-09
Supplement: s1 [file s1]

# Supplementary material

## Potent and selective benzothiazole-based antimitotics with improved water solubility: design, synthesis, and evaluation as novel anticancer agents

Laura Gallego-Yerga <sup>1,2,3,\*</sup>, Valentín Ceña <sup>4,5</sup> and Rafael Peláez <sup>1,2,3,\*</sup>

|                                                     |    |
|-----------------------------------------------------|----|
| NMR spectra of compounds <b>1</b> - <b>24</b> ..... | 2  |
| Supplementary figure S25.....                       | 27 |
| Supplementary table S1.....                         | 28 |

**$^1\text{H}$  NMR**

**$^{13}\text{C}$  NMR**

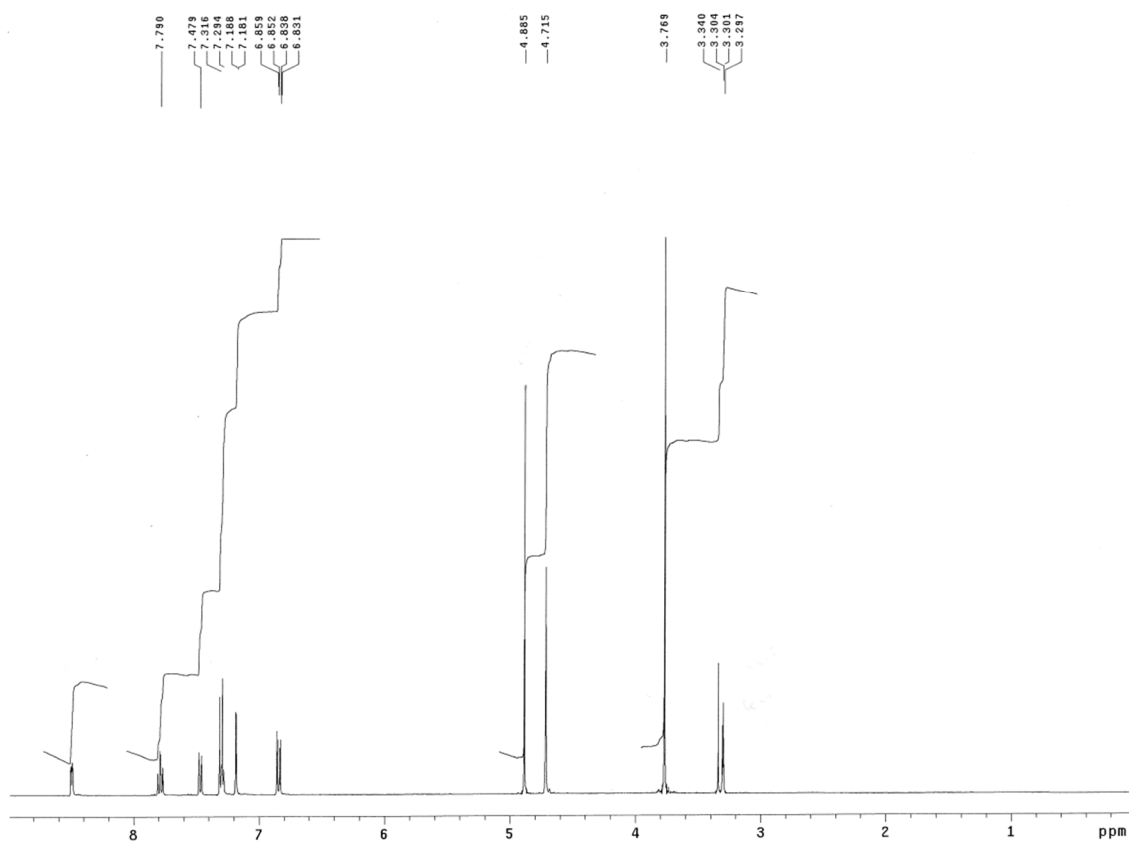

Figure S1a. <sup>1</sup>H NMR (MeOD, 400 MHz) spectrum of compound **1**.

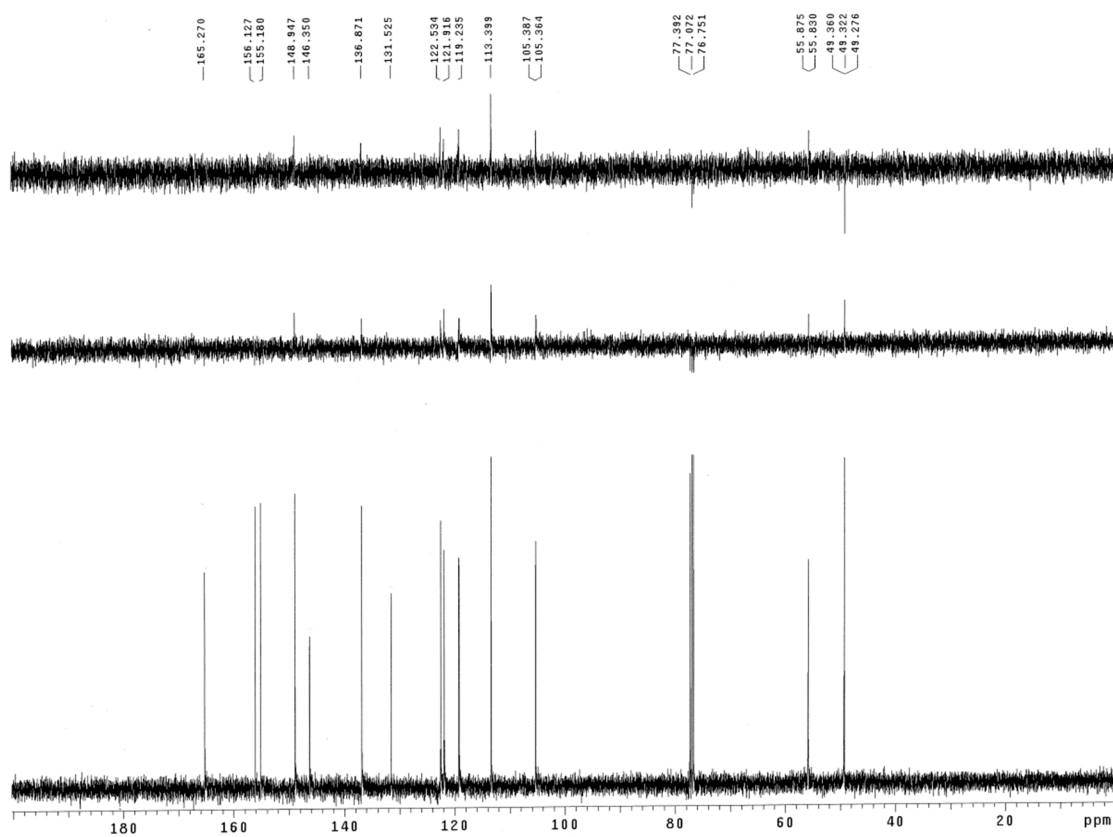

Figure S1b. <sup>13</sup>C NMR (CDCl<sub>3</sub>, 100 MHz) spectra of compound **1**.

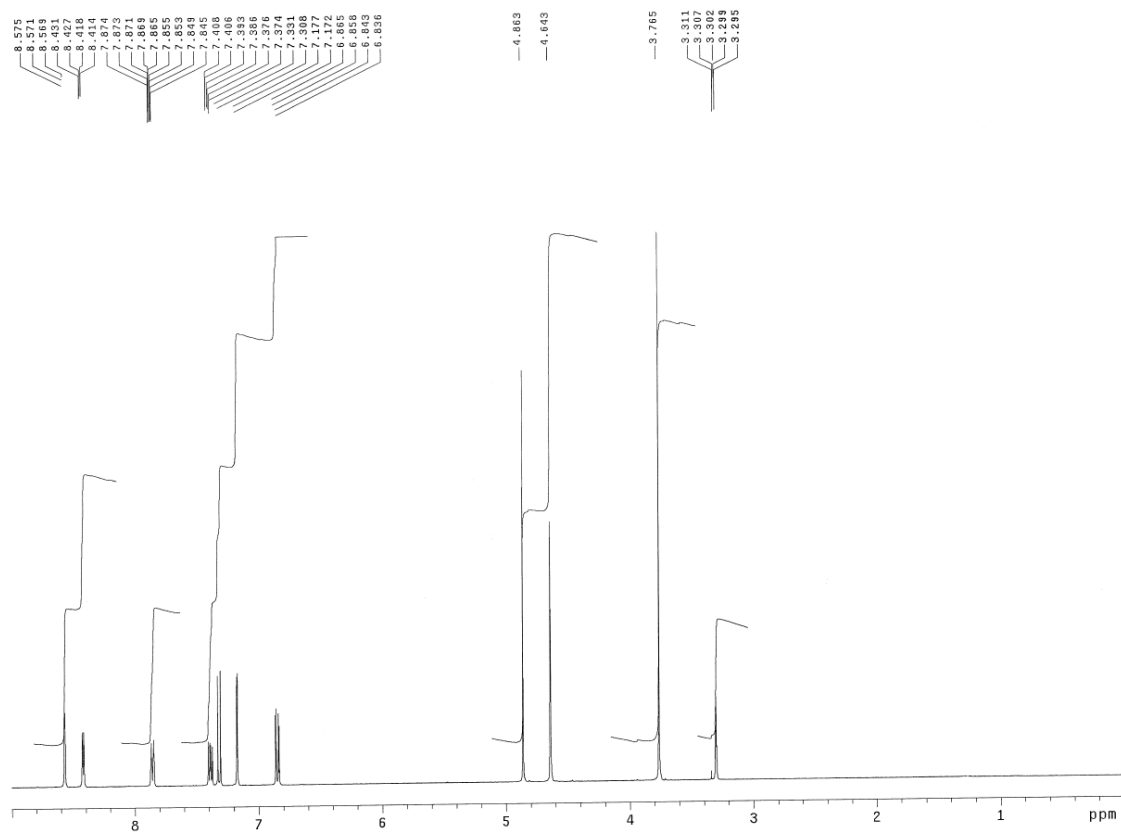

Figure S2a. <sup>1</sup>H NMR (MeOD, 400 MHz) spectrum of compound 2.

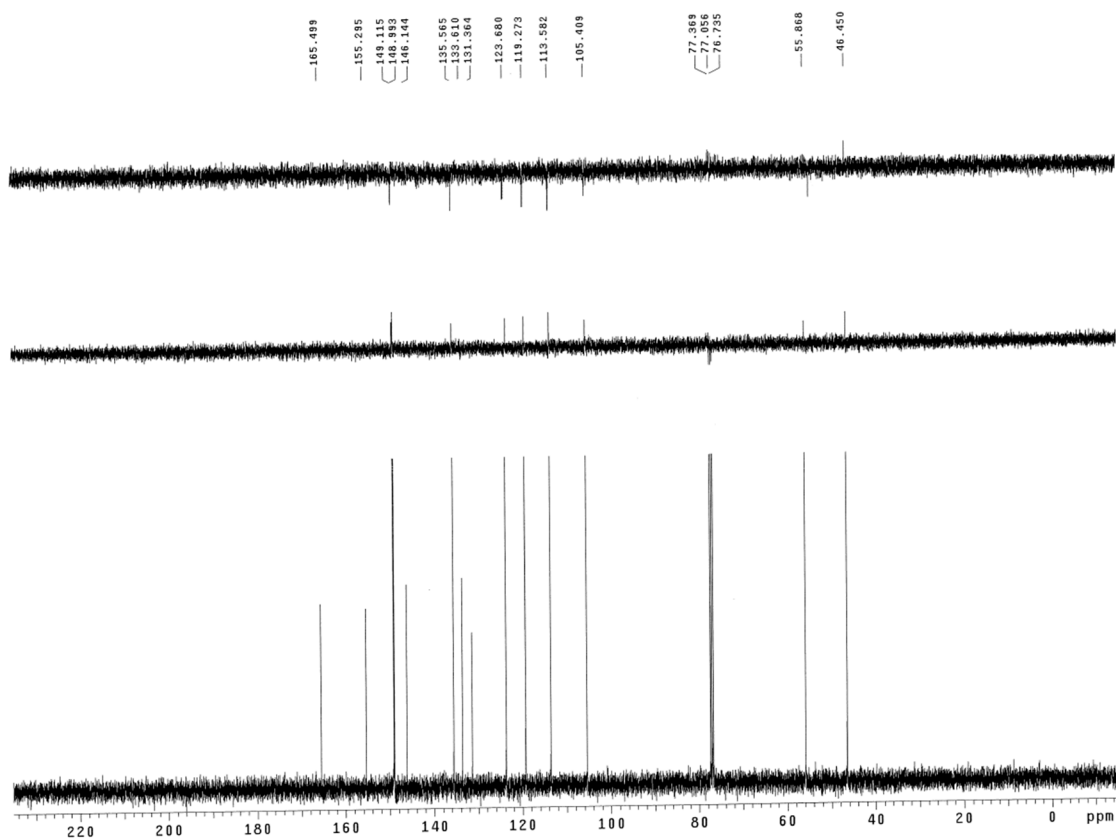

Figure S2b. <sup>13</sup>C NMR (CDCl<sub>3</sub>, 100 MHz) spectra of compound 2.

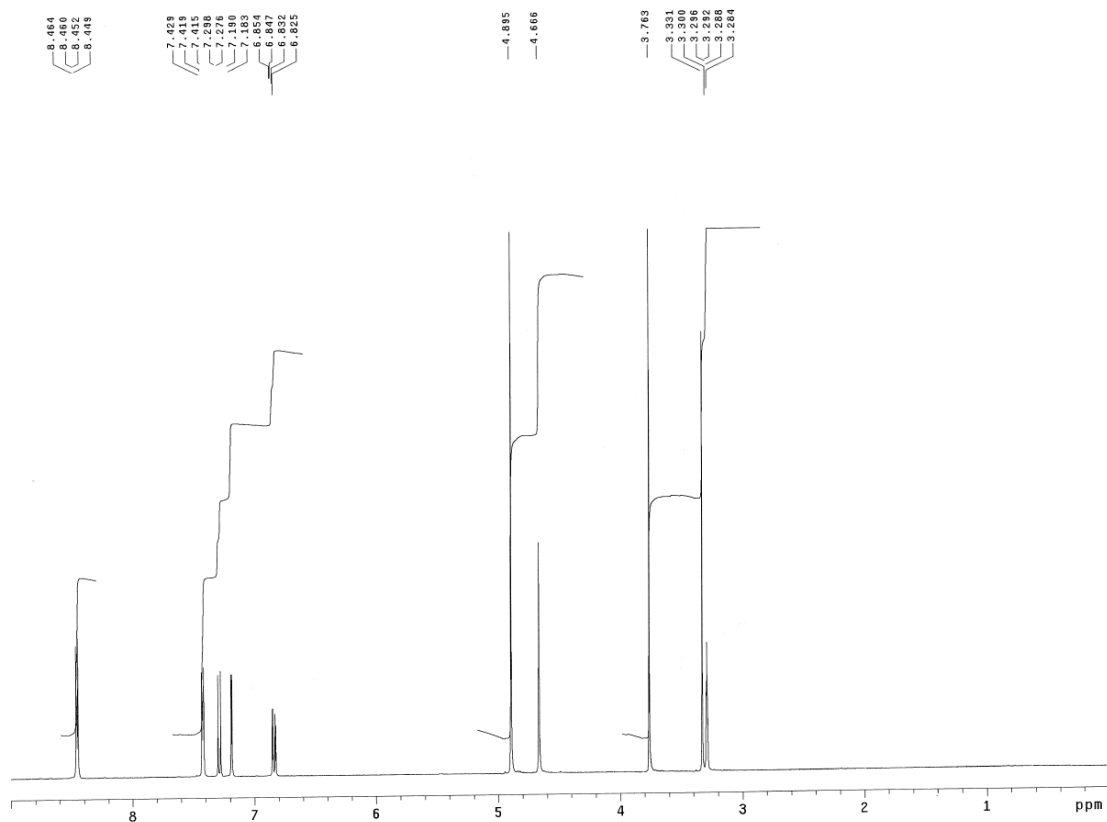

Figure S3a. <sup>1</sup>H NMR (MeOD, 400 MHz) spectrum of compound **3**.

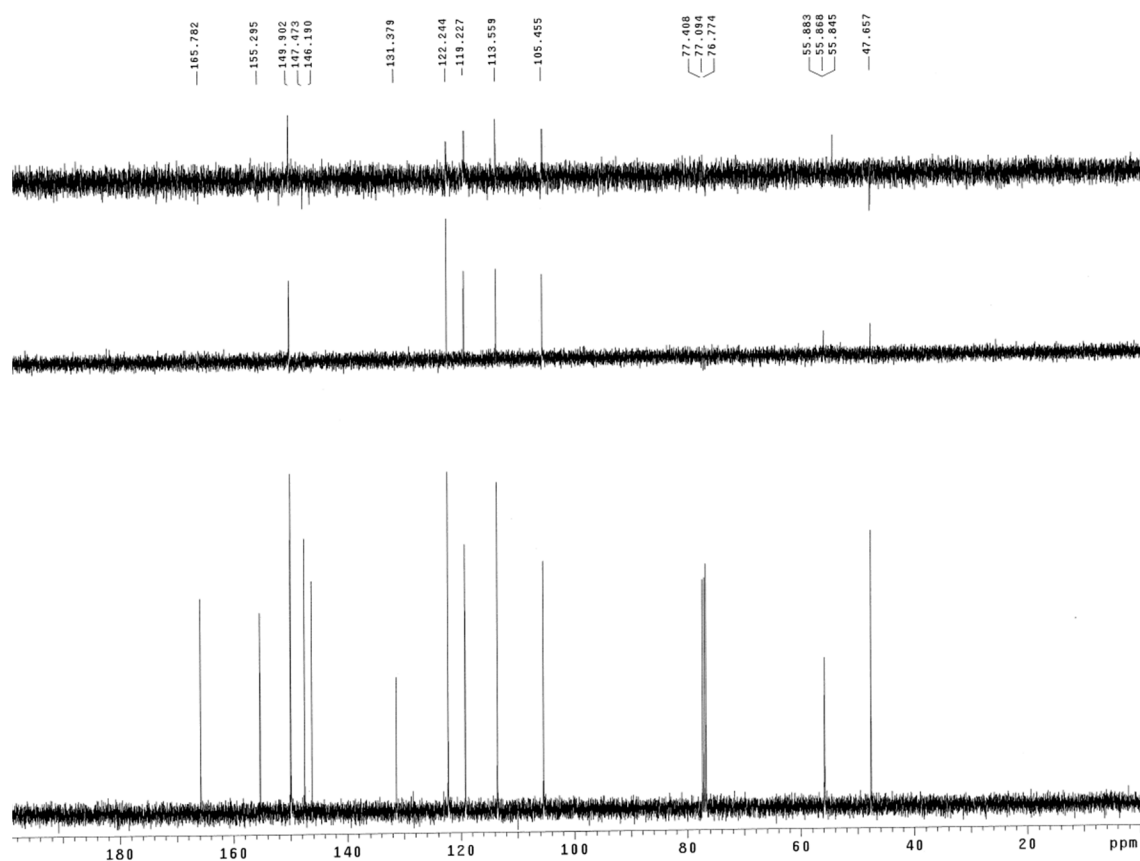

Figure S3b. <sup>13</sup>C NMR (CDCl<sub>3</sub>, 100 MHz) spectra of compound **3**.

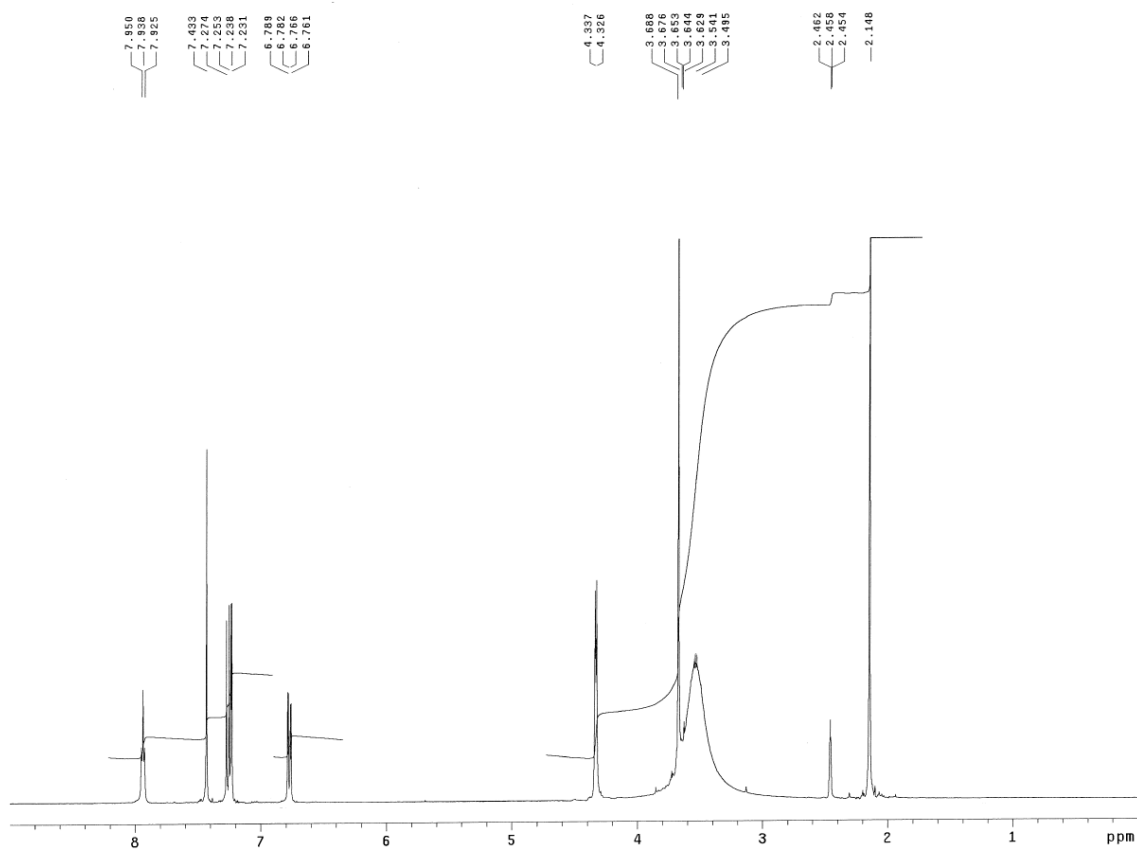

**Figure S4a.** <sup>1</sup>H NMR (DMSO-d<sub>6</sub>, 400 MHz) spectrum of compound 4.

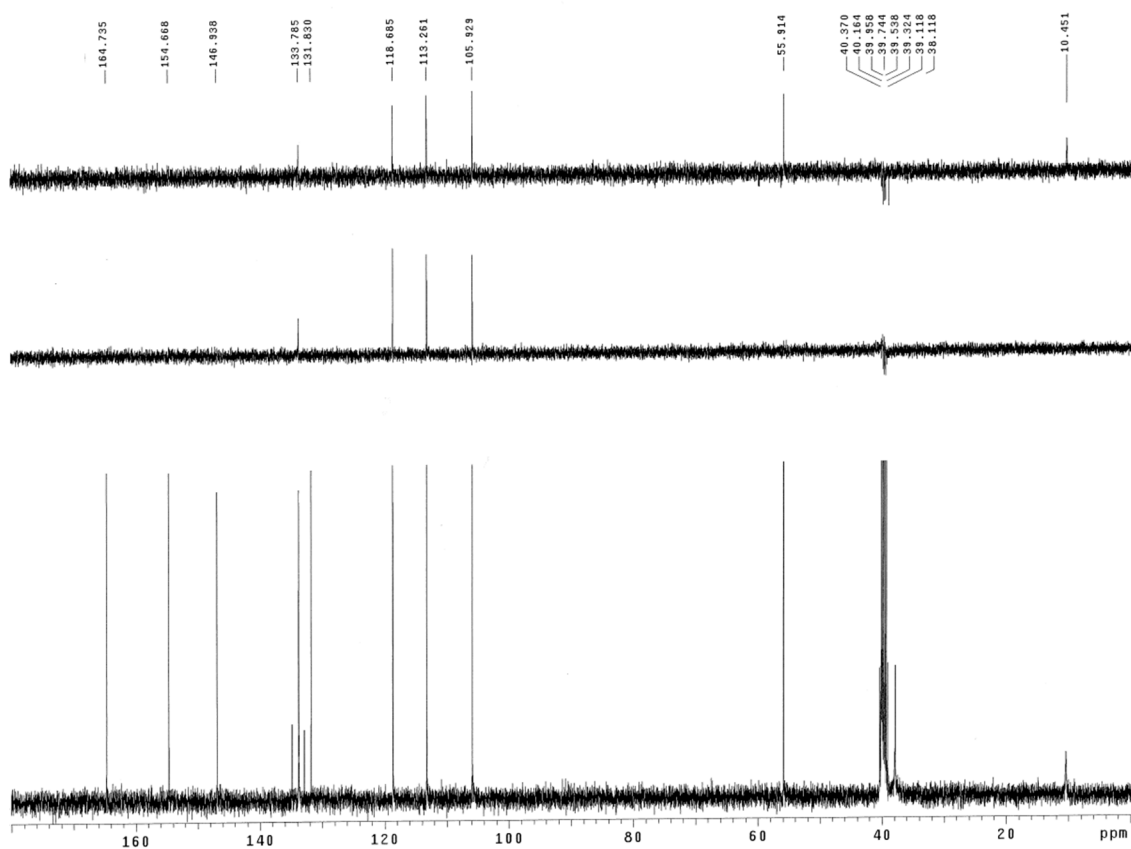

**Figure S4b.** <sup>13</sup>C NMR (DMSO-d<sub>6</sub>, 100 MHz) spectra of compound 4.

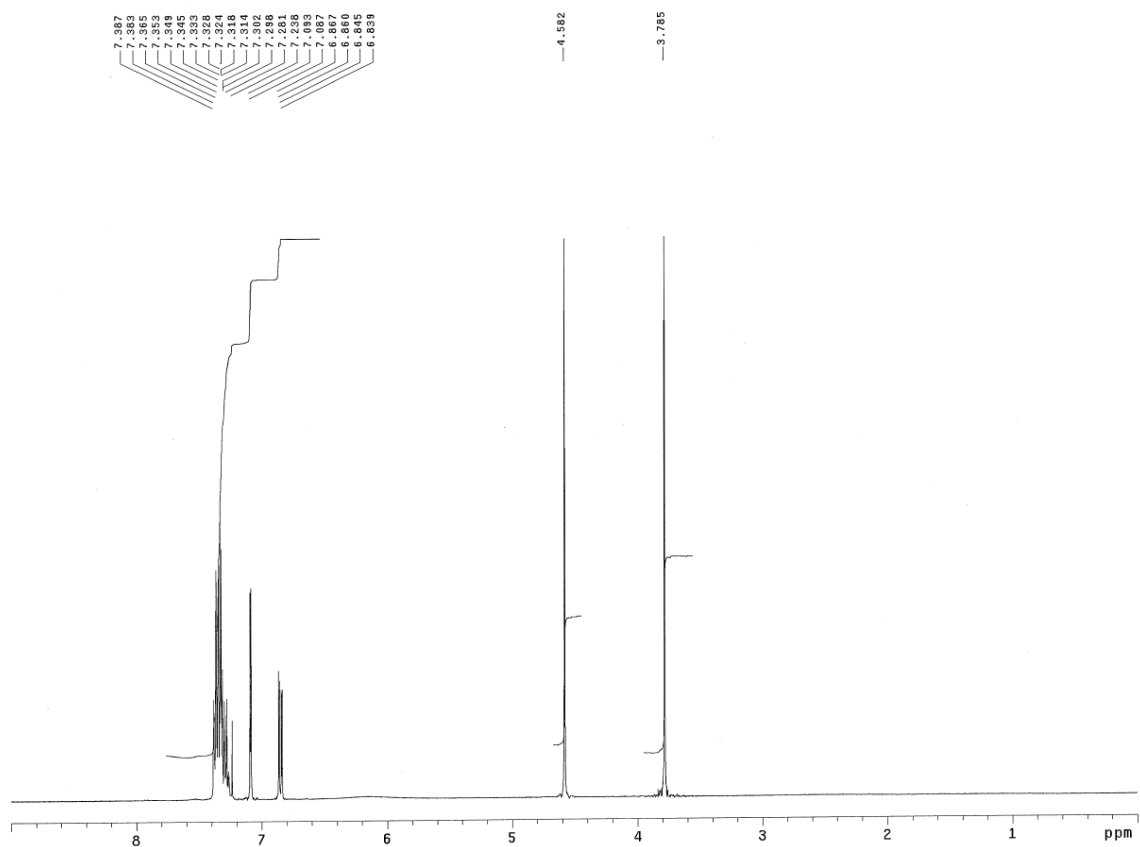

Figure S5a.  $^1\text{H}$  NMR ( $\text{CDCl}_3$ , 400 MHz) spectrum of compound **5**.

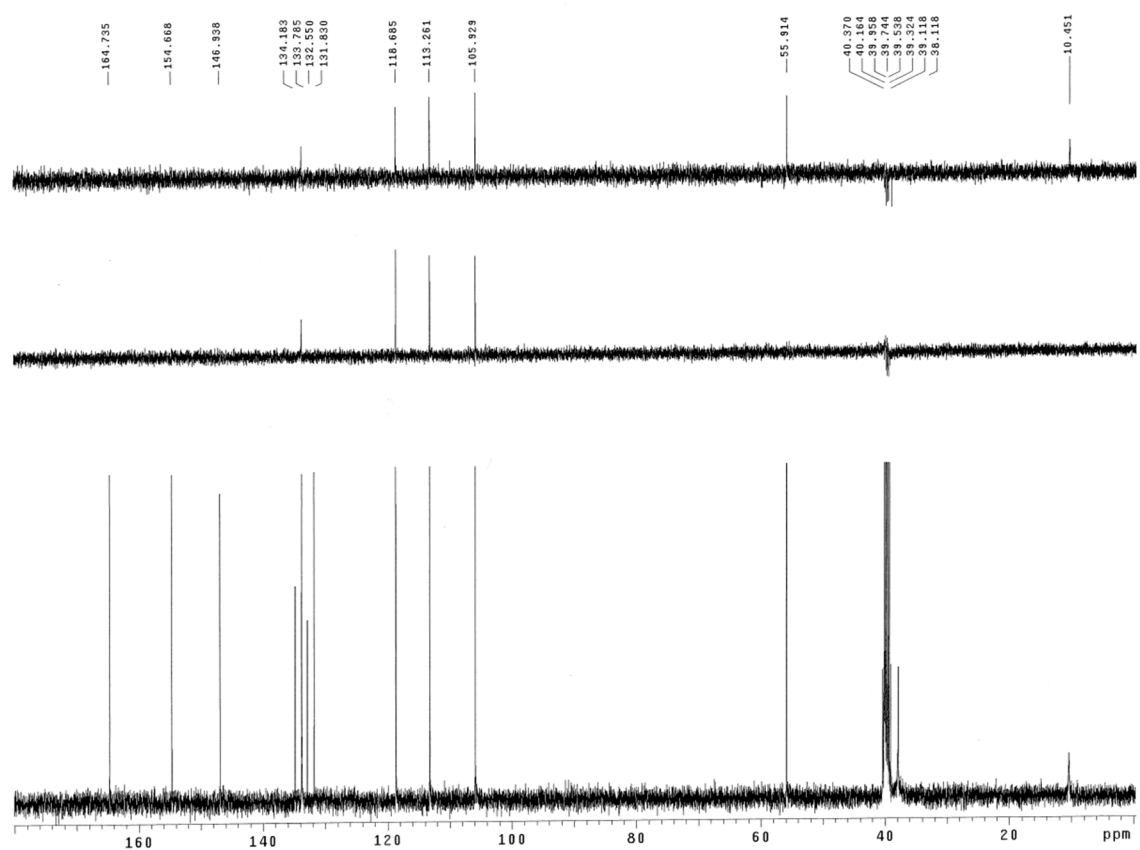

Figure S5b.  $^{13}\text{C}$  NMR ( $\text{CDCl}_3$ , 100 MHz) spectra of compound **5**.

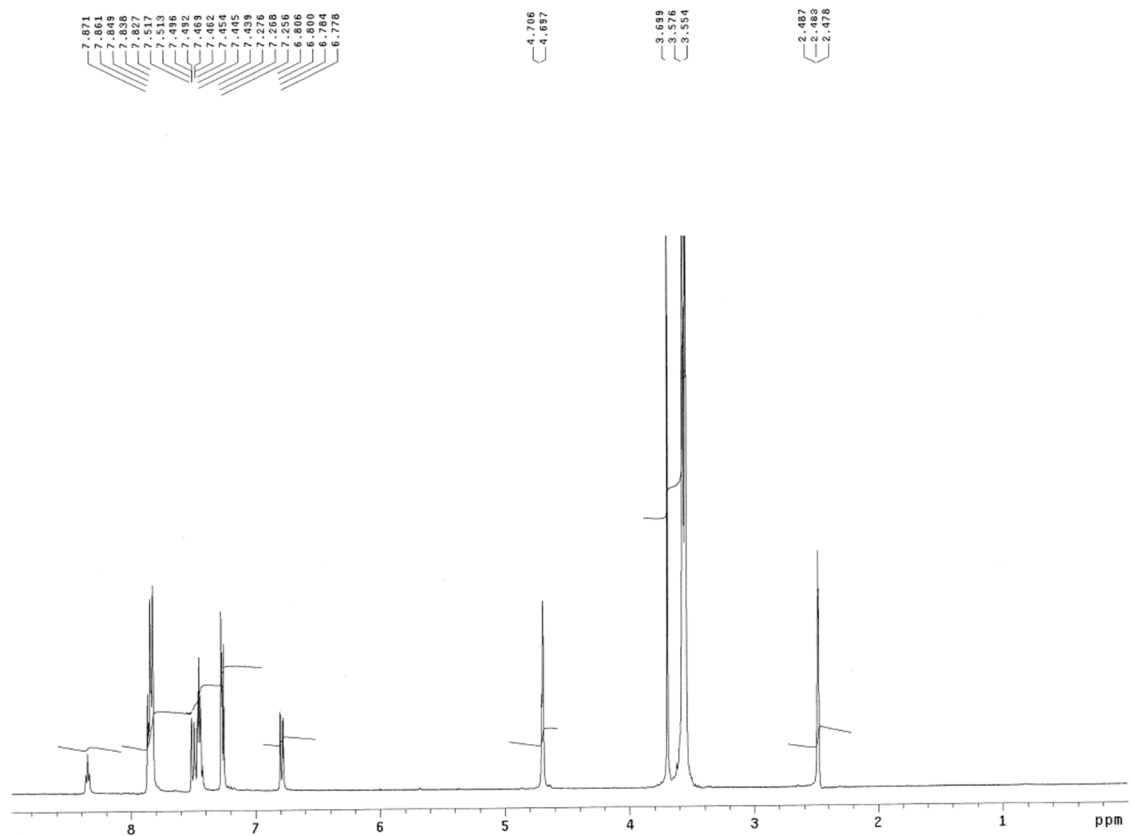

Figure S6a. <sup>1</sup>H NMR (CDCl<sub>3</sub>, 400 MHz) spectrum of compound **6**.

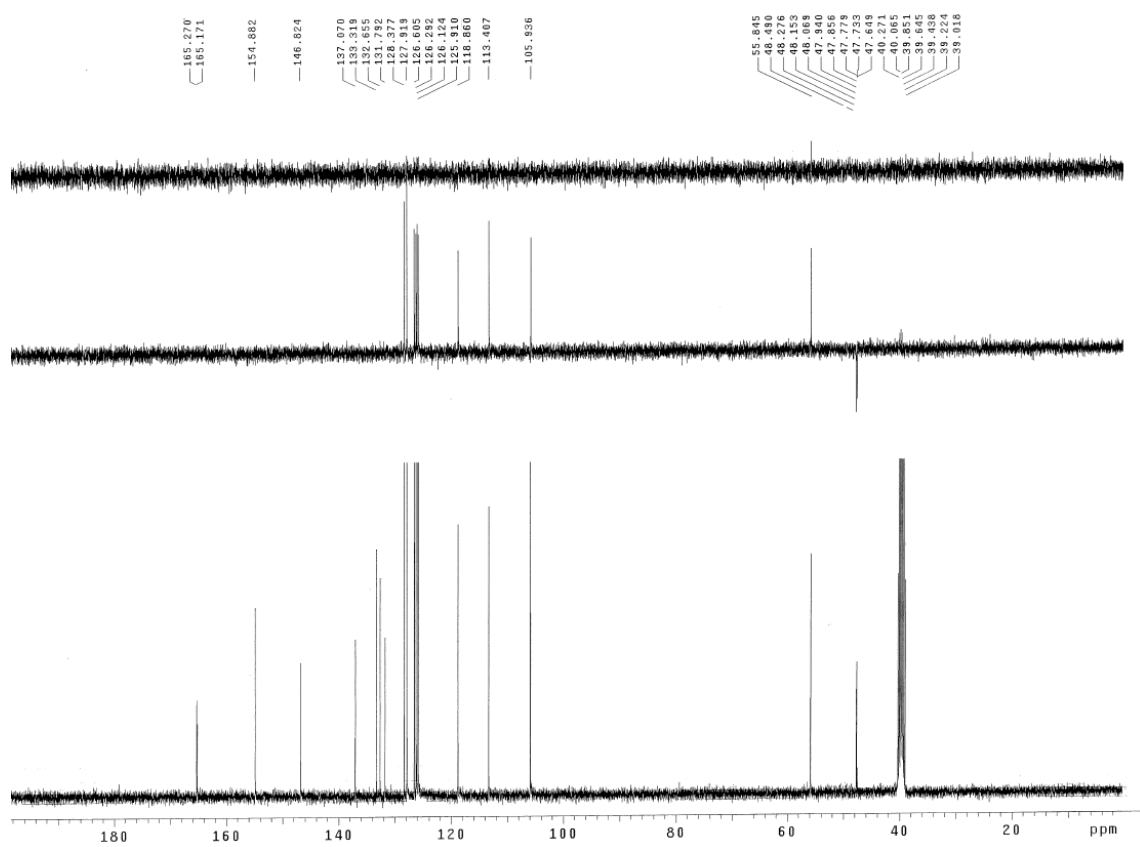

Figure S6b. <sup>13</sup>C NMR (DMSO-d<sub>6</sub>, 100 MHz) spectra of compound **6**.



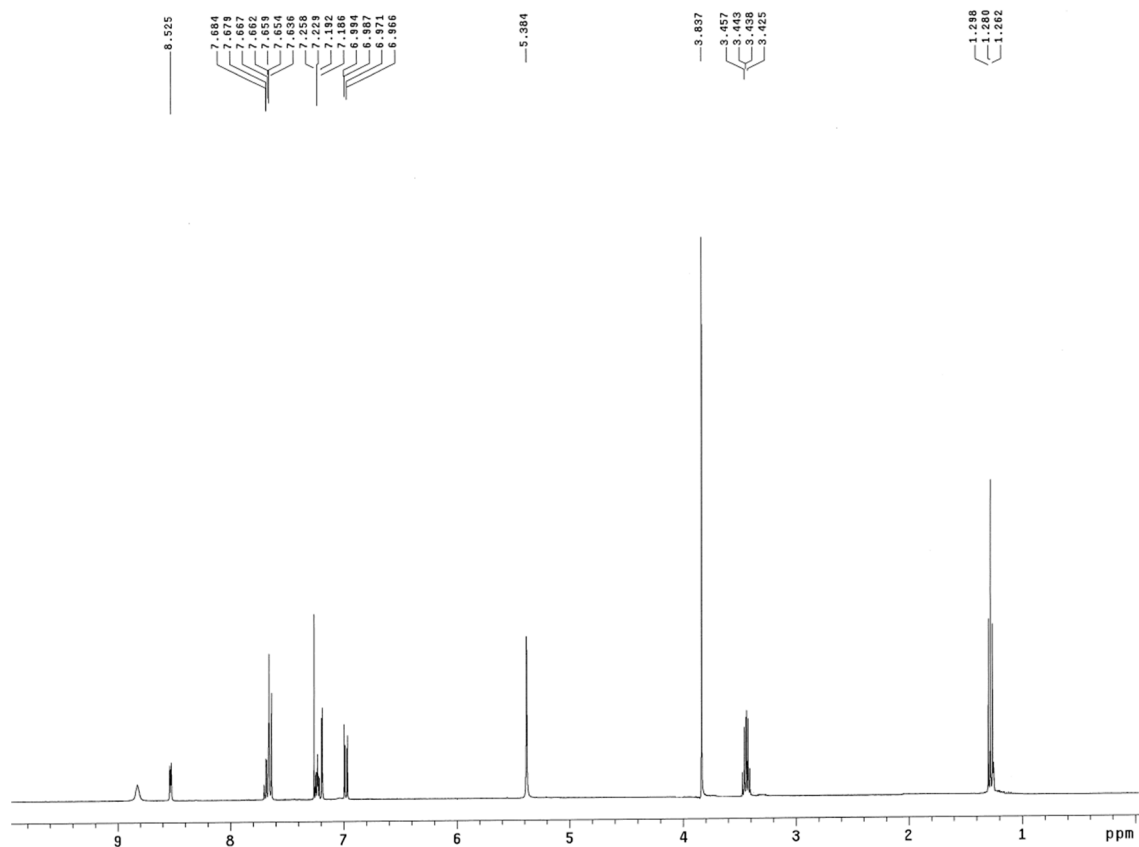

Figure S7a.  $^1\text{H}$  NMR ( $\text{CDCl}_3$ , 400 MHz) spectrum of compound **7**.

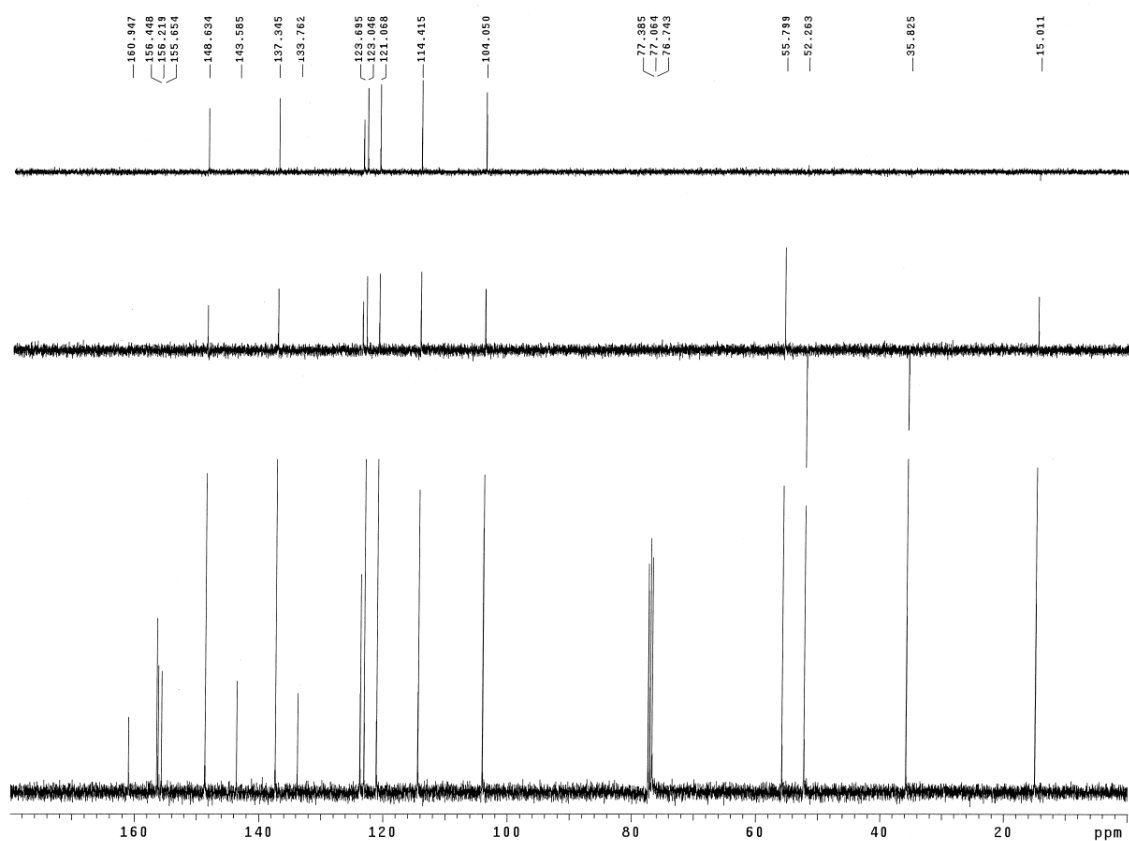

Figure S7b.  $^{13}\text{C}$  NMR ( $\text{CDCl}_3$ , 100 MHz) spectra of compound **7**.

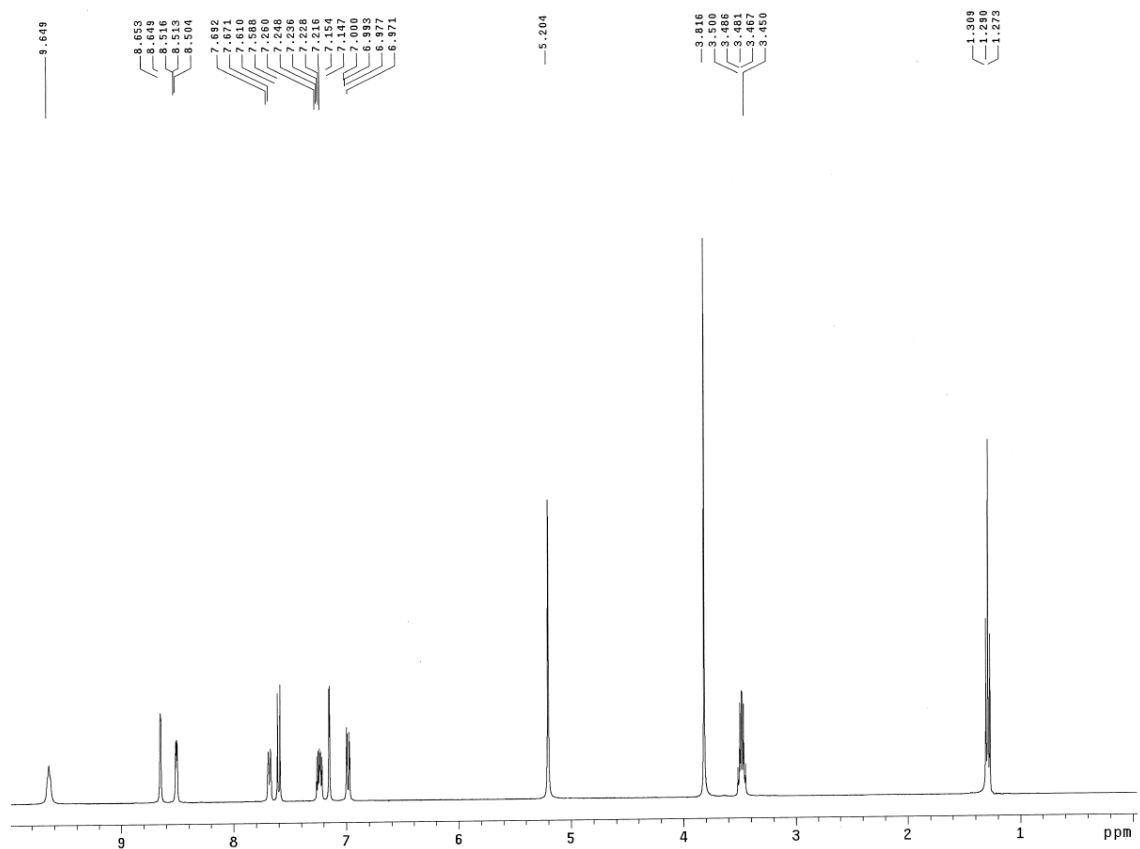

**Figure S8a.**  $^1\text{H}$  NMR ( $\text{CDCl}_3$ , 400 MHz) spectrum of compound **8**.

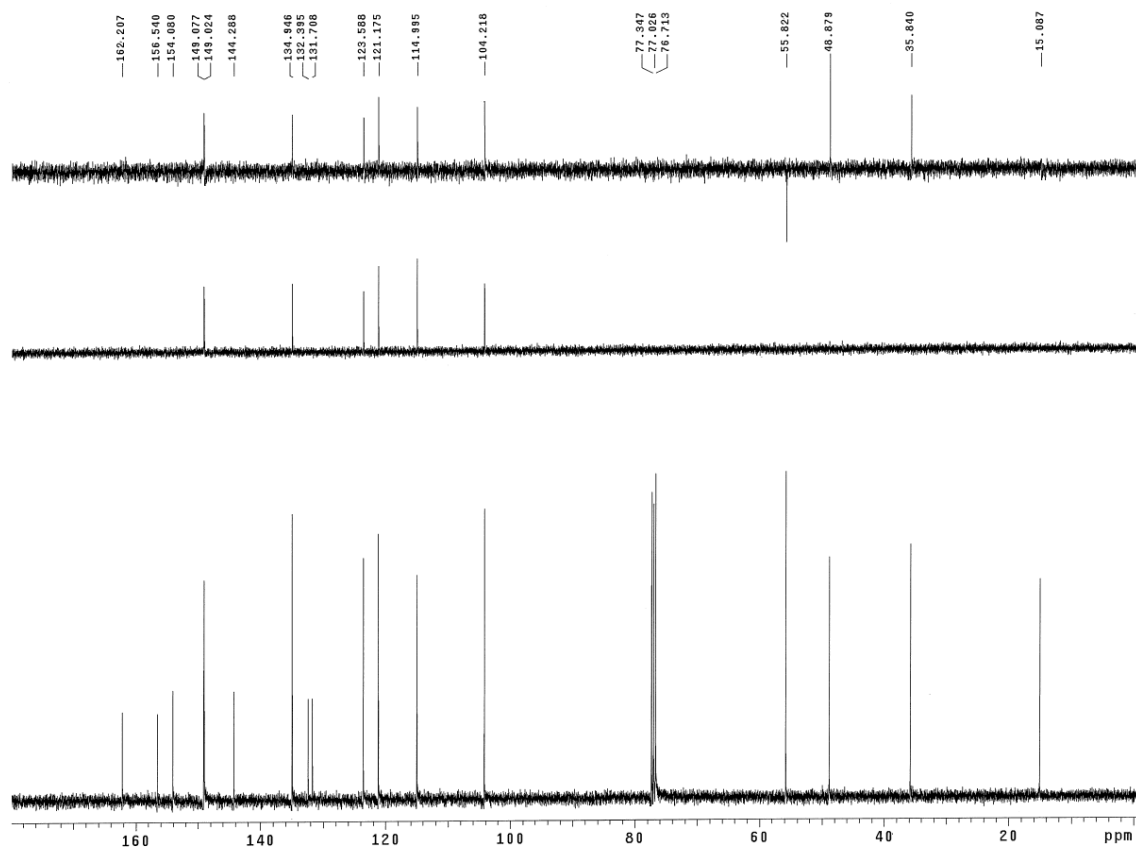

**Figure S8b.**  $^{13}\text{C}$  NMR ( $\text{CDCl}_3$ , 100 MHz) spectra of compound **8**.

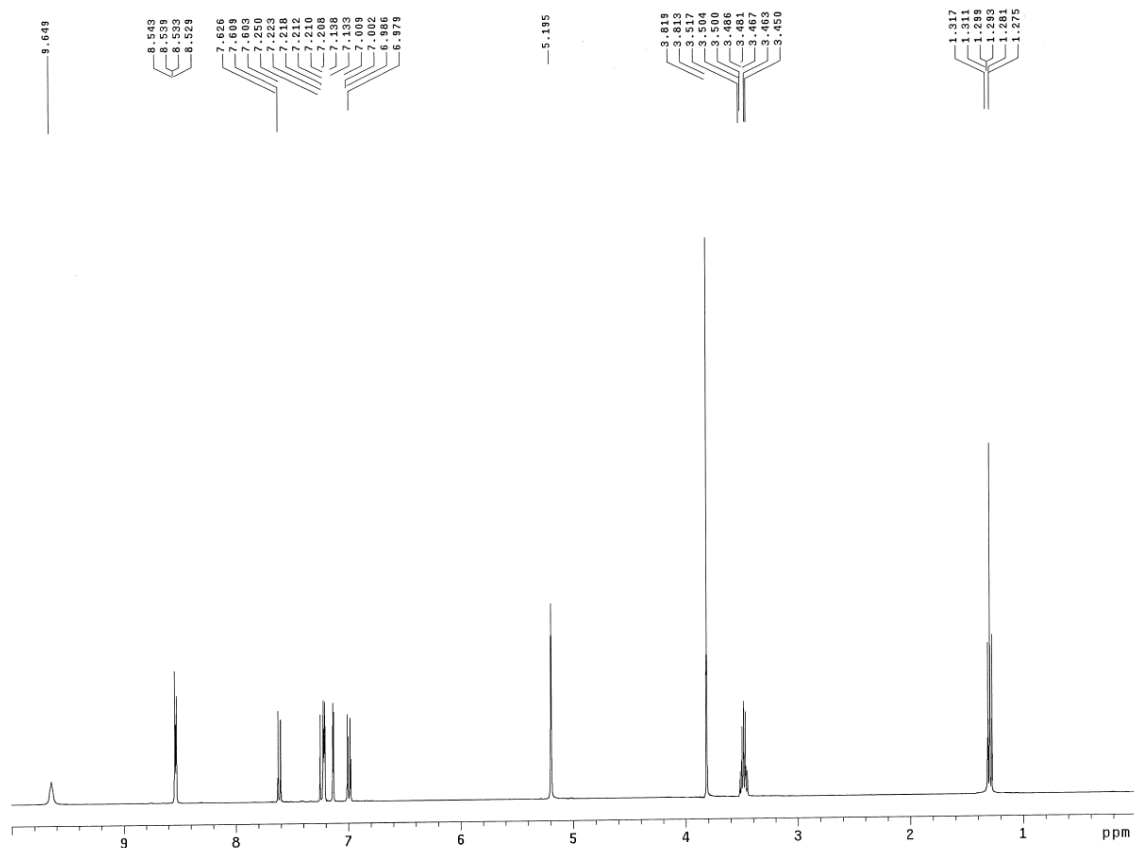

Figure S9a.  $^1\text{H}$  NMR ( $\text{CDCl}_3$ , 400 MHz) spectrum of compound **9**.

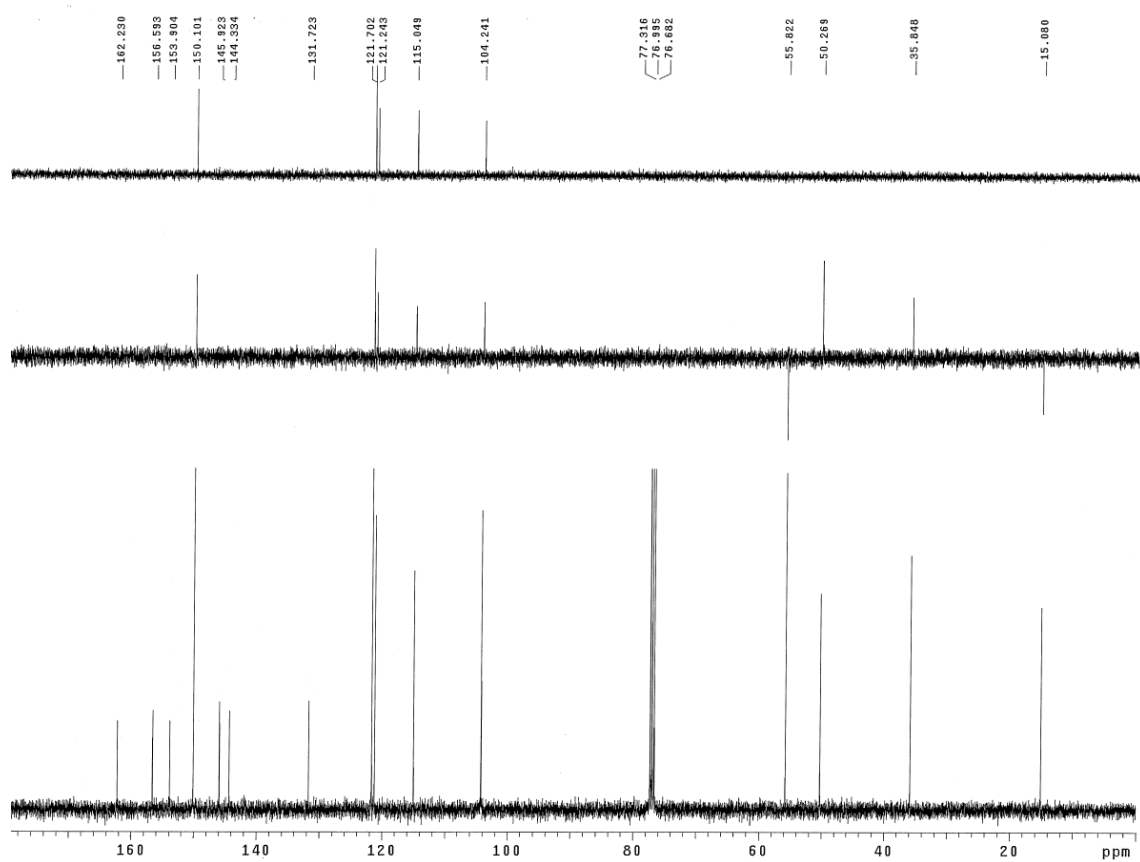

Figure S9b.  $^{13}\text{C}$  NMR ( $\text{CDCl}_3$ , 100 MHz) spectra of compound **9**.

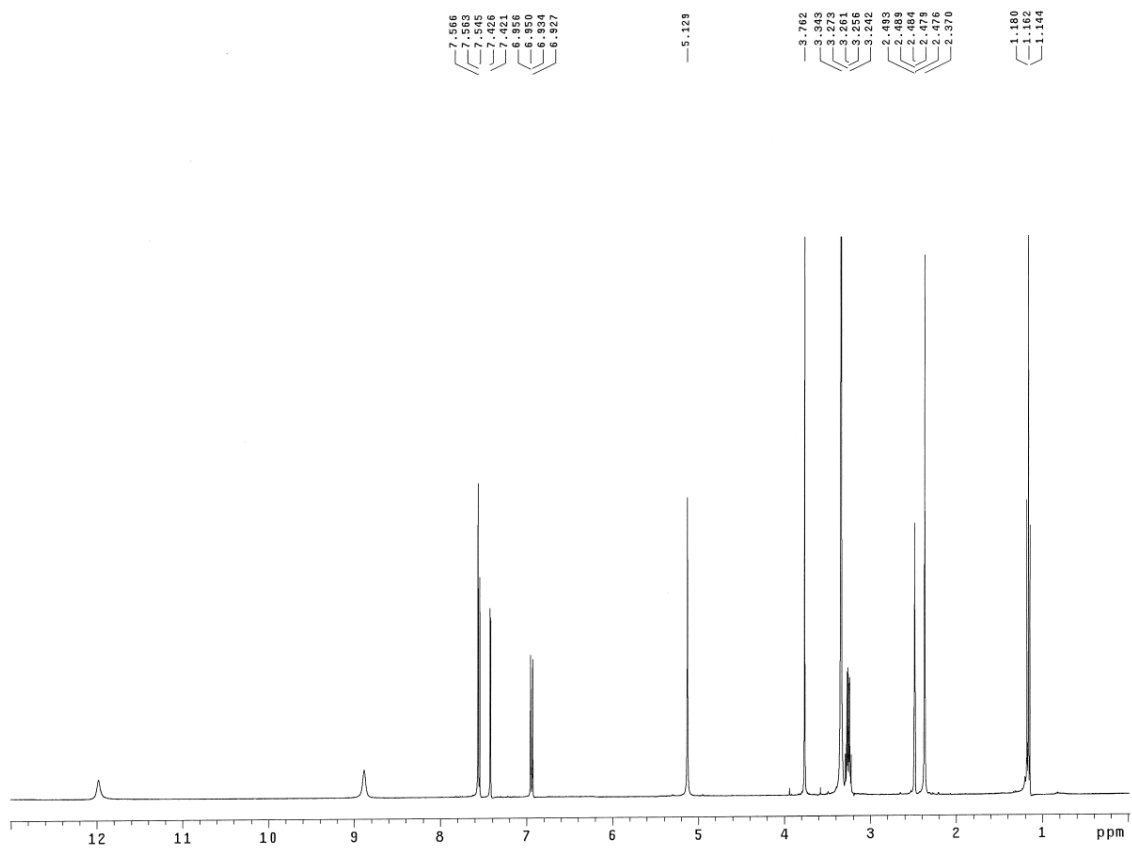

**Figure S10a.**  $^1\text{H}$  NMR (DMSO- $\text{d}_6$ , 400 MHz) spectrum of compound **10**.

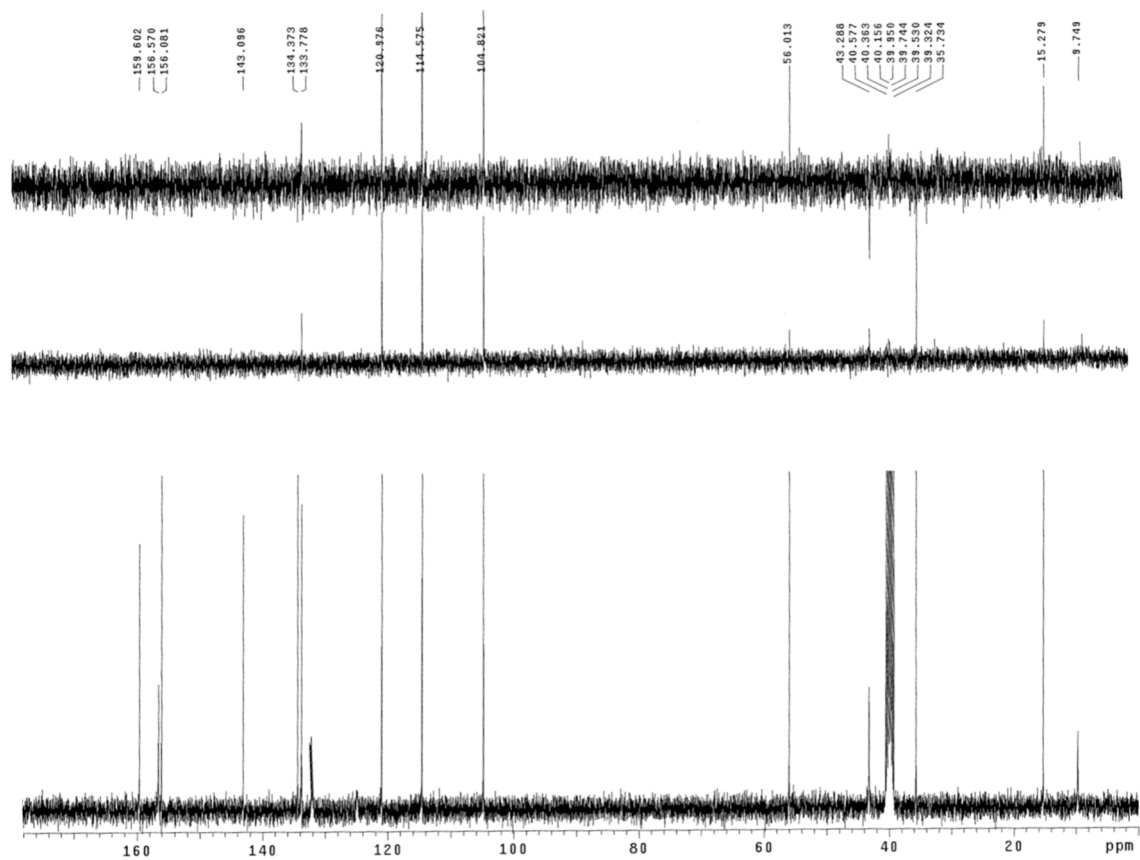

**Figure S10b.**  $^{13}\text{C}$  NMR (DMSO- $\text{d}_6$ , 100 MHz) spectra of compound **10**.

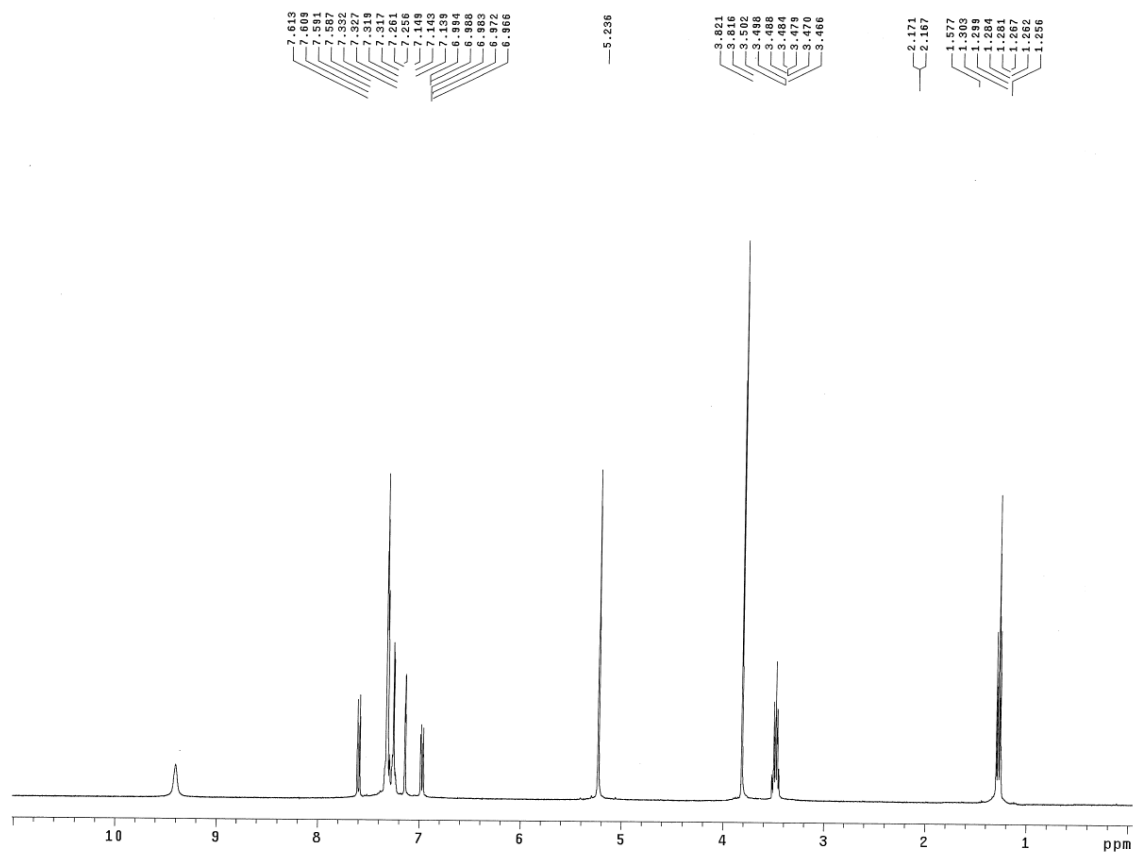

**Figure S11a.**  $^1\text{H}$  NMR ( $\text{CDCl}_3$ , 400 MHz) spectrum of compound **11**.

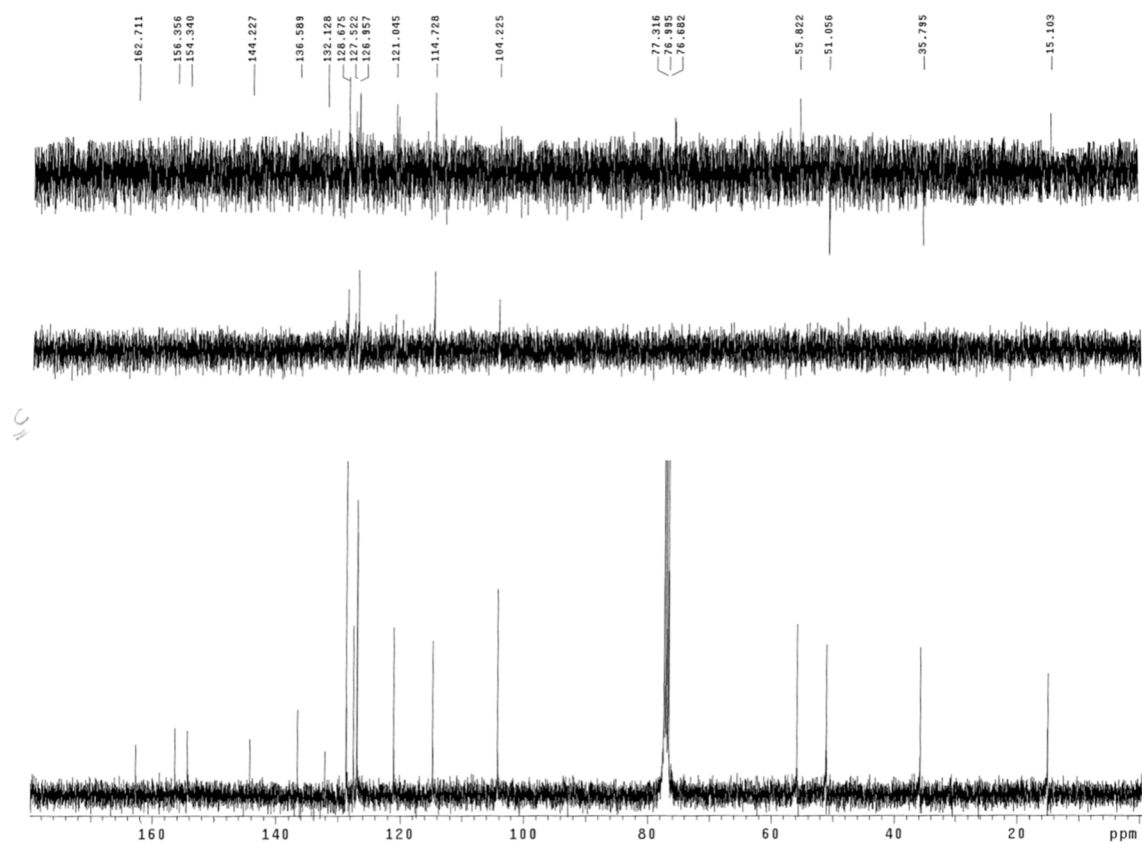

**Figure S11b.**  $^{13}\text{C}$  NMR ( $\text{CDCl}_3$ , 100 MHz) spectra of compound **11**.

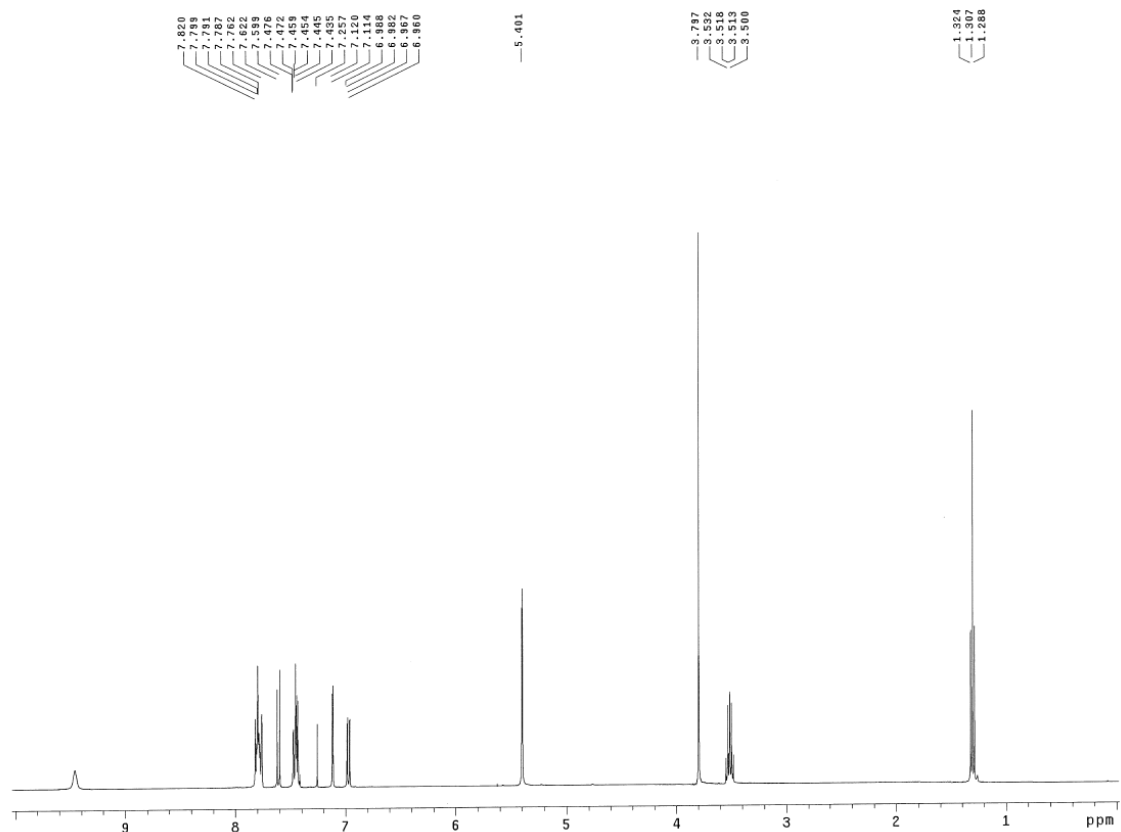

**Figure S12a.**  $^1\text{H}$  NMR ( $\text{CDCl}_3$ , 400 MHz) spectrum of compound **12**.

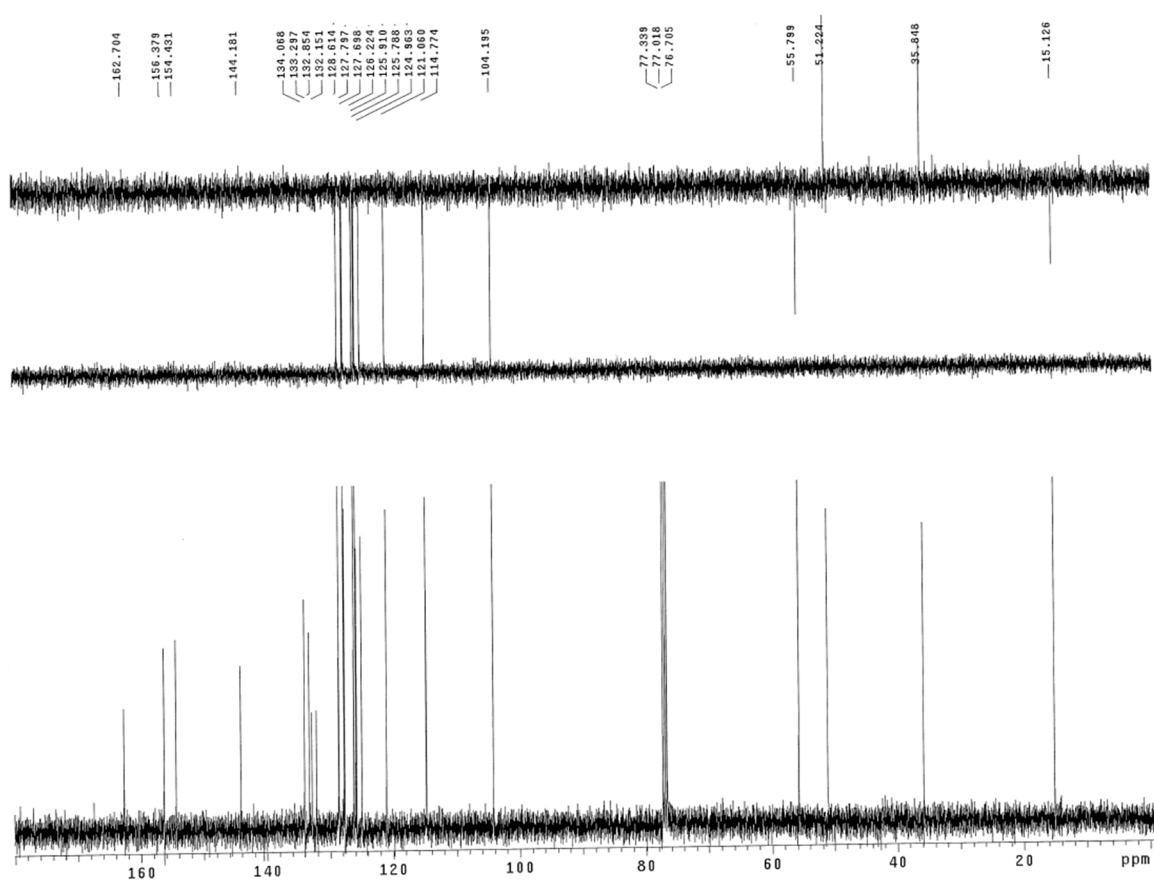

**Figure S12b.**  $^{13}\text{C}$  NMR ( $\text{CDCl}_3$ , 100 MHz) spectra of compound **12**.

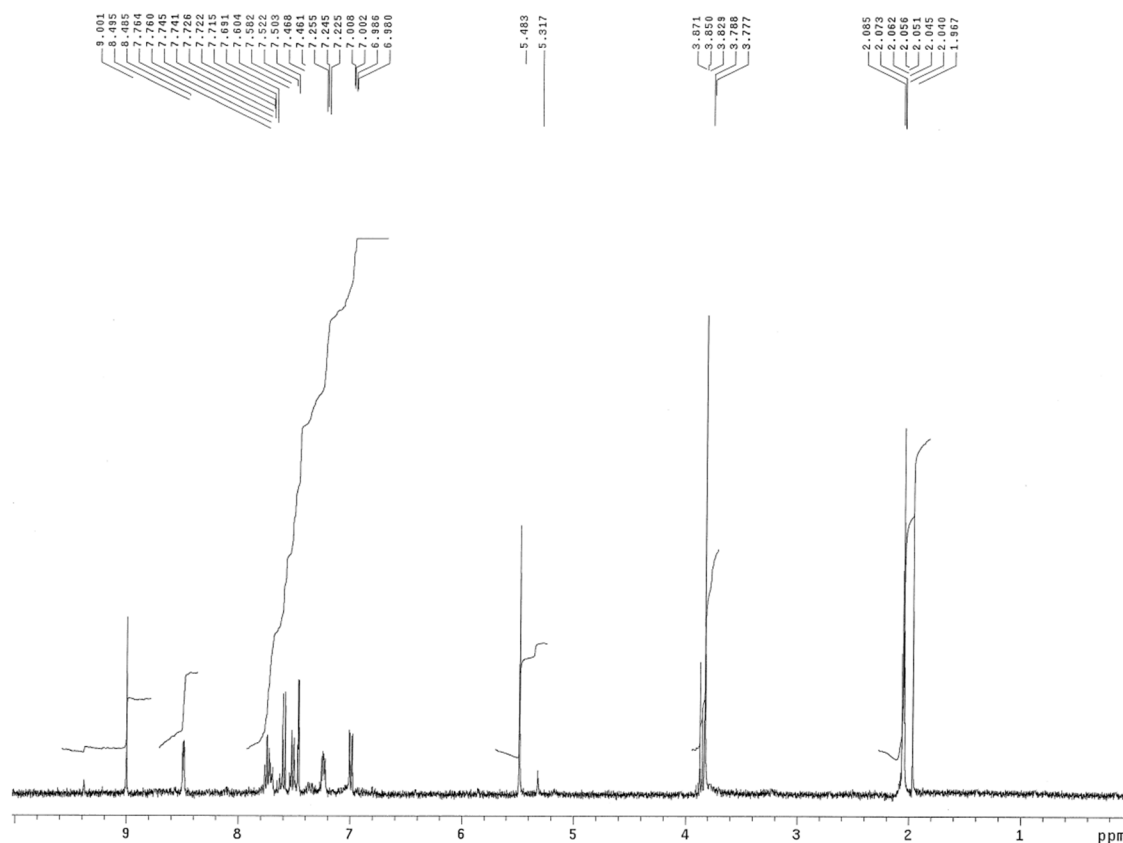

Figure S13a. <sup>1</sup>H NMR (acetone-d<sub>6</sub>, 400 MHz) spectrum of compound **13**.

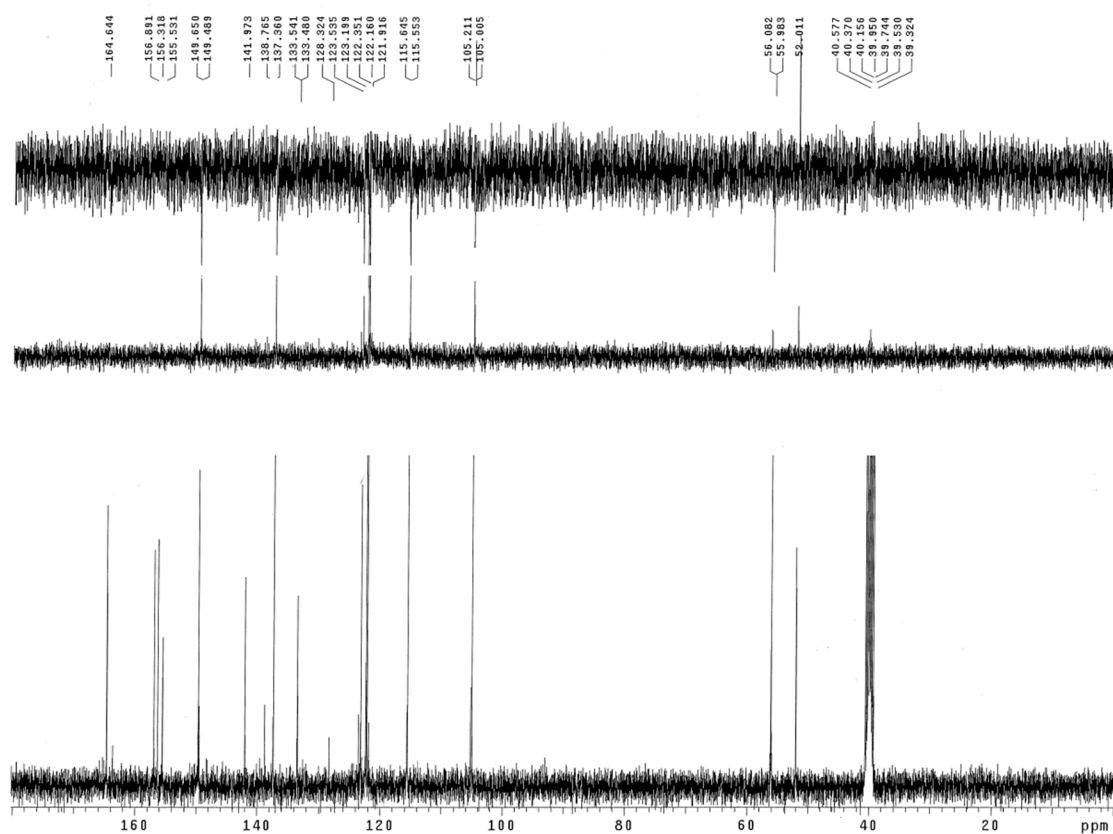

Figure S13b. <sup>13</sup>C NMR (DMSO-d<sub>6</sub>, 100 MHz) spectra of compound **13**.
